# Supplementary material for: Long-term outcomes for patients treated for macular oedema secondary to retinal vein occlusion: a systematic review
Source: HighWire-hosted journal article supplement (doi:10.1136/bmjophth-2022-001010), 2022-06-01

Supplemental Table 5 – Risk of Bias Tables

| Case Series                  | Did the study address a clearly focused issue? | Was the cohort recruited in an acceptable way? | Was the exposure accurately measured to minimise bias? | Was the outcome accurately measured to minimise bias? | Have the authors identified all important confounding factors? | Have they taken account of the confounding factors in the design and/or analysis? | Was the follow up of subjects complete enough? | Was the follow up of subjects long enough? | Do you believe the results? | 10. Can the results be applied to the local population? | 11. Do the results of this study fit with other available evidence? | 12. What are the implications of this study for practice? | Overall |
|------------------------------|------------------------------------------------|------------------------------------------------|--------------------------------------------------------|-------------------------------------------------------|----------------------------------------------------------------|-----------------------------------------------------------------------------------|------------------------------------------------|--------------------------------------------|-----------------------------|---------------------------------------------------------|---------------------------------------------------------------------|-----------------------------------------------------------|---------|
| (Blin et al 2018)            | Green                                          | Orange                                         | Green                                                  | Green                                                 | Red                                                            | Green                                                                             | Green                                          | Green                                      | Green                       | Green                                                   | Green                                                               | Long term use of ranibizumab is effective.                | Orange  |
| (Brown et al 2014)           | Green                                          | Green                                          | Green                                                  | Green                                                 | Green                                                          | Green                                                                             | Green                                          | Green                                      | Green                       | Green                                                   | Green                                                               | Ranibizumab in CRVO improves retinal anatomy and vision   | Green   |
| (Calugaru and Calugaru 2015) | Green                                          | Green                                          | Green                                                  | Green                                                 | Green                                                          | Green                                                                             | Orange                                         | Orange                                     | Green                       | Green                                                   | Green                                                               | "IVB = sustained vision over 3 years"                     | Orange  |
| (Campochiaro et al 2014)     | Green                                          | Green                                          | Green                                                  | Green                                                 | Green                                                          | Green                                                                             | Green                                          | Green                                      | Green                       | Orange                                                  | Green                                                               | "LTO with ranibizumab are excellent"                      | Orange  |
| (Hikichi et al 2014)         | Green                                          | Green                                          | Green                                                  | Green                                                 | Green                                                          | Green                                                                             | Green                                          | Orange                                     | Green                       | Green                                                   | Green                                                               | IVB is beneficial over 2 years                            | Green   |
| (Horner et al 2020)          | Green                                          | Green                                          | Green                                                  | Green                                                 | Red                                                            | Green                                                                             | Green                                          | Green                                      | Green                       | Green                                                   | Green                                                               | Combination therapy is effective                          | Green   |
| Inagaki et al 2019)          | Green                                          | Green                                          | Green                                                  | Green                                                 | Green                                                          | Green                                                                             | Green                                          | Green                                      | Green                       | Orange                                                  | Green                                                               | "IVR + PRN gave pretty good visual outcome at month 24"   | Green   |
| (Khurana et al 2019)         | Green                                          | Green                                          | Green                                                  | Green                                                 | Green                                                          | Green                                                                             | Green                                          | Orange                                     | Green                       | Green                                                   | Green                                                               | Sustained benefits of TAE aflibercept over 2 years        | Green   |



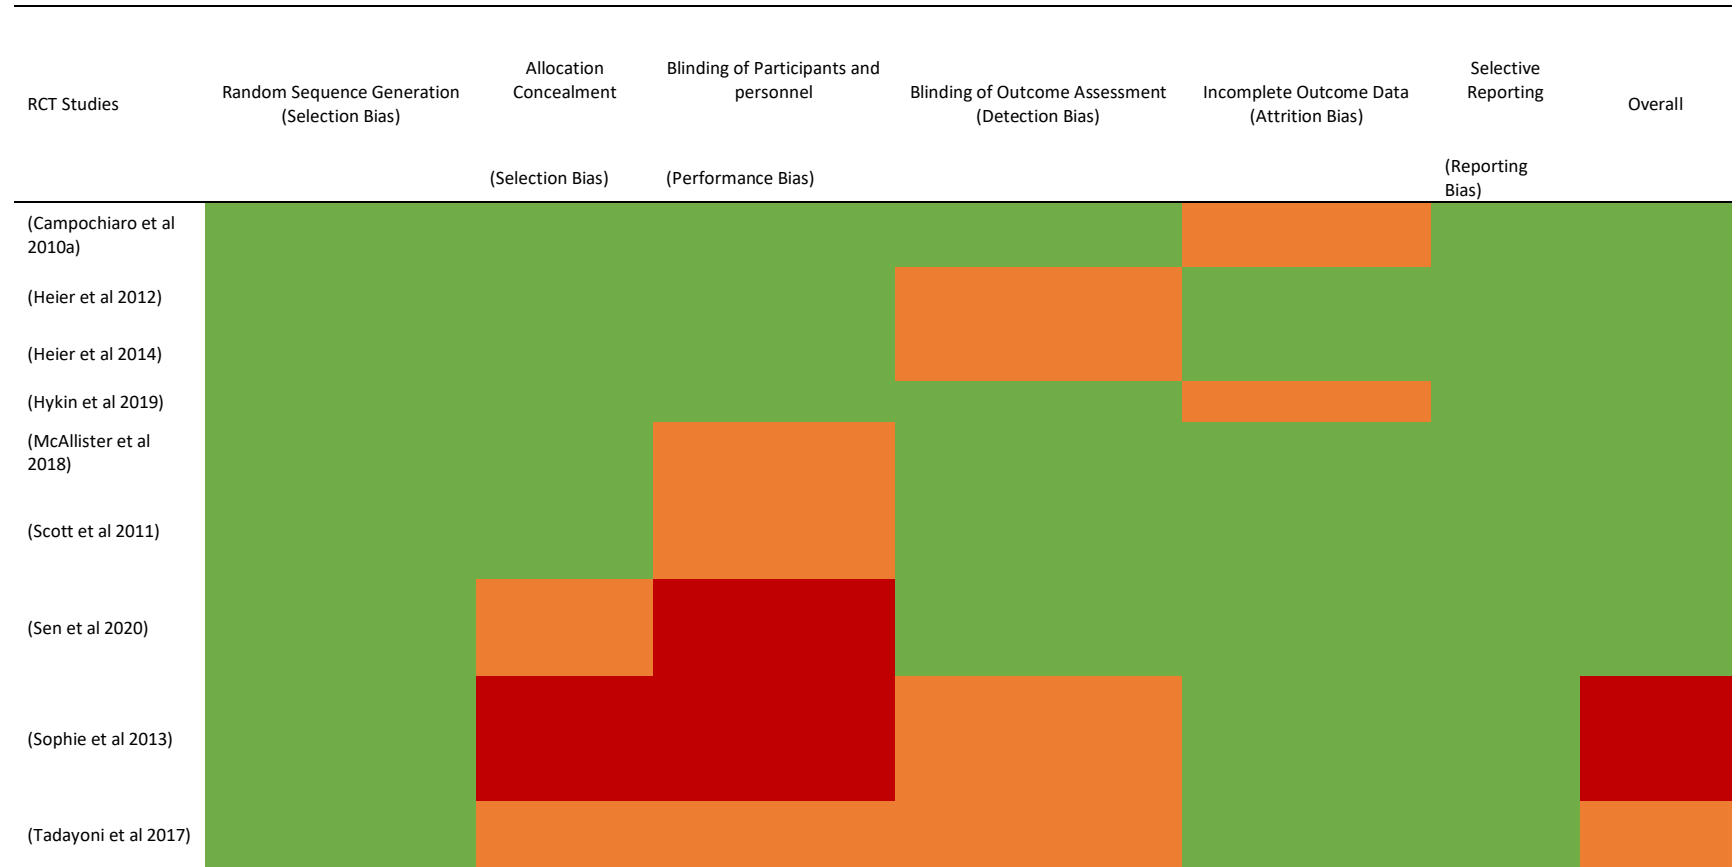

| Cohort Studies           | Were patient demographic characteristics clearly described? | Was there clear reporting of clinical information of the participants? | Were there clear criteria for inclusion in the case series? | Was the condition measured in a standard, reliable way for all participants included in the case series? | Was the intervention(s) or treatment procedure(s) clearly described? | Were the outcomes or follow up results of cases clearly reported? | Were adverse events (harms) or unanticipated events identified and described? | Was statistical analysis appropriate? | Overall |
|--------------------------|-------------------------------------------------------------|------------------------------------------------------------------------|-------------------------------------------------------------|----------------------------------------------------------------------------------------------------------|----------------------------------------------------------------------|-------------------------------------------------------------------|-------------------------------------------------------------------------------|---------------------------------------|---------|
| (Abdallah et al 2019)    | Red                                                         | Orange                                                                 | Green                                                       | Green                                                                                                    | Green                                                                | Orange                                                            | Orange                                                                        | Orange                                | Red     |
| (Bajric et al 2015)      | Green                                                       | Green                                                                  | Green                                                       | Orange                                                                                                   | Green                                                                | Green                                                             | Orange                                                                        | Green                                 | Green   |
| (Blanc et al 2018)       | Green                                                       | Green                                                                  | Green                                                       | Green                                                                                                    | Green                                                                | Green                                                             | Green                                                                         | Green                                 | Green   |
| (Busch et al 2018)       | Green                                                       | Green                                                                  | Green                                                       | Green                                                                                                    | Green                                                                | Green                                                             | Red                                                                           | Green                                 | Orange  |
| (Chatziralli et al 2018) | Green                                                       | Orange                                                                 | Green                                                       | Green                                                                                                    | Green                                                                | Green                                                             | Green                                                                         | Green                                 | Green   |
| Chatziralli et al (2017) | Green                                                       | Green                                                                  | Green                                                       | Green                                                                                                    | Green                                                                | Green                                                             | Green                                                                         | Green                                 | Green   |
| (Chittajallu et al 2018) | Red                                                         | Orange                                                                 | Green                                                       | Green                                                                                                    | Green                                                                | Green                                                             | Green                                                                         | Orange                                | Orange  |
| (Costa et al 2021)       | Green                                                       | Green                                                                  | Green                                                       | Green                                                                                                    | Green                                                                | Green                                                             | Orange                                                                        | Green                                 | Green   |
| (Farinha et al 2016)     | Green                                                       | Green                                                                  | Green                                                       | Green                                                                                                    | Green                                                                | Green                                                             | Orange                                                                        | Green                                 | Green   |

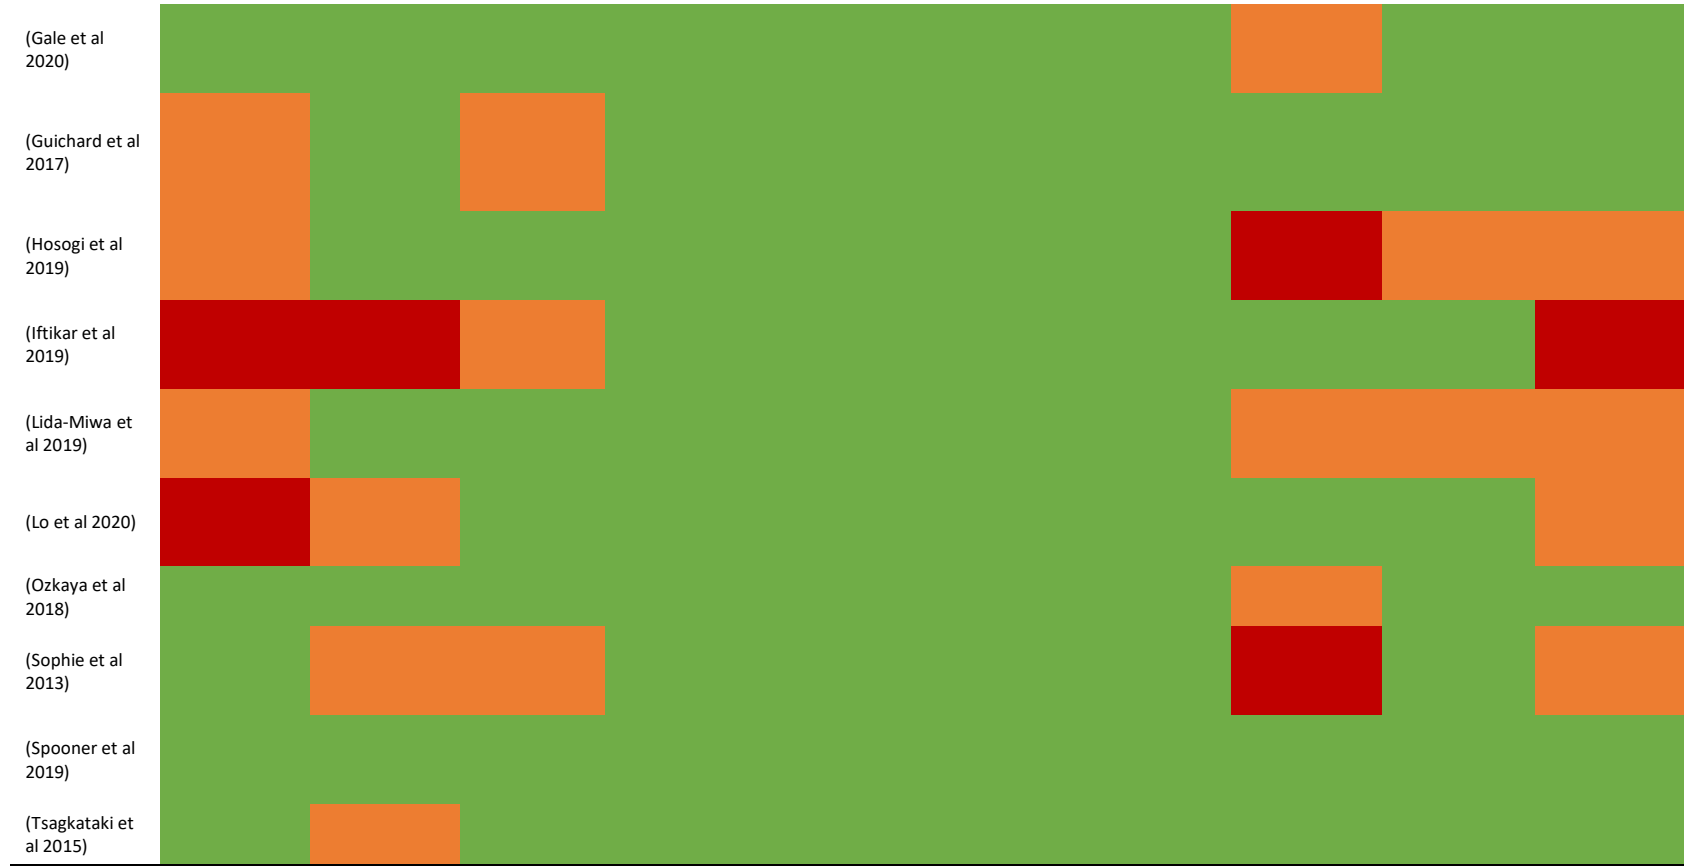

Supplement: bmjophth-2022-001010supp005_data_supplement.pdf [file bmjophth-2022-001010supp005_data_supplement.pdf]
