# Supplementary material for: Long-term outcomes for patients treated for macular oedema secondary to retinal vein occlusion: a systematic review
Source: PubMed Central journal article supplement — BMJ Open Ophthalmol. 2022 Jun 14;7(1):e001010. doi: 10.1136/bmjophth-2022-001010 (PMC9198693; doi:10.1136/bmjophth-2022-001010), 2022-06-14
Supplement: bmjophth-2022-001010supp001.pdf [file bmjophth-2022-001010supp001.pdf]

Supplemental Table 1. Search concepts for search one.

|           | Population <sub>1</sub> | Population <sub>2</sub>  | Intervention                     |
|-----------|-------------------------|--------------------------|----------------------------------|
| <i>OR</i> | Macular oedema          | Retina* vein occlusion   | Intravitreal injection*          |
| <i>OR</i> | Macular edema           | Retinal vein blockage    | Intravitreal treatment*          |
| <i>OR</i> |                         | Retinal venous occlusion | Intravitreal drug administration |
| <i>OR</i> |                         | Retinal venous blockage  | Intravitreal                     |
|           |                         | Retinal disease*         |                                  |
|           | <i>AND</i>              | <i>AND</i>               | <i>AND</i>                       |
