# Supplementary material for: Long-term outcomes for patients treated for macular oedema secondary to retinal vein occlusion: a systematic review
Source: HighWire-hosted journal article supplement (doi:10.1136/bmjophth-2022-001010), 2022-06-01
Supplement: bmjophth-2022-001010supp002_data_supplement.pdf [file bmjophth-2022-001010supp002_data_supplement.pdf]

## Supplemental Table 2. Additional search concepts for search two.

|    | Intervention  |
|----|---------------|
| OR | Bevacizumab   |
| OR | Aflibercept   |
| OR | Ranibizumab   |
| OR | Dexamethasone |
| OR | Triamcinolone |
| OR | Steroid       |
|    | AND           |
