# Supplementary material for: Long-term outcomes for patients treated for macular oedema secondary to retinal vein occlusion: a systematic review
Source: PubMed Central journal article supplement — BMJ Open Ophthalmol. 2022 Jun 14;7(1):e001010. doi: 10.1136/bmjophth-2022-001010 (PMC9198693; doi:10.1136/bmjophth-2022-001010), 2022-06-14
Supplement: bmjophth-2022-001010supp003.pdf [file bmjophth-2022-001010supp003.pdf]

Supplemental Table 3. Included papers in this review (n=48)

| Study author & year           | Participants (n) | Study type                | RVO type                  | Drug regimen                             | Study outcomes                  | Conclusions                                                    |
|-------------------------------|------------------|---------------------------|---------------------------|------------------------------------------|---------------------------------|----------------------------------------------------------------|
| (Abdallah et al., 2019)       | 9                | Retrospective case series | Separate CRVO & BRVO data | Dexamethasone                            | BCVA & CRT at 3 years           | No significant vision gains with dexamethasone.                |
| (Bajric & Bakri, 2016)        | 5                | Retrospective case series | CRVO only                 | Combination                              | BCVA & CRT at 2, 3 & 4 years    | BCVA & CRT improvement maintained at four years.               |
| (Blanc et al., 2018)          | 66               | Retrospective case series | Mixed                     | Dexamethasone & combination              | BCVA & CRT at 2 & 3 years       | Dexamethasone effective at 3 years.                            |
| (Blin et al., 2018)           | 301              | Cohort                    | Separate CRVO & BRVO data | Ranibizumab                              | BCVA & CRT at 2 years           | Ranibizumab effective at 2 years.                              |
| (Brown et al., 2014)          | 15               | Cohort                    | CRVO only                 | Ranibizumab                              | BCVA & CRT at 2 years           | Ranibizumab improved vision.                                   |
| (Busch et al., 2019)          | 155              | Retrospective case series | Separate CRVO & BRVO data | Combination                              | BCVA & CRT at 2 & 3 years       | Early treatment improved final outcomes.                       |
| (Calugaru & Calugaru, 2015)   | 57               | Cohort                    | CRVO only                 | Bevacizumab                              | BCVA & CRT at 3 years           | Bevacizumab improved vision at 3 years.                        |
| (Campochiaro et al., 2010a)   | 40               | RCT                       | Separate CRVO & BRVO data | Combination                              | BCVA & CRT at 2 years           | Long term visual improvement with anti-VEGF.                   |
| (Campochiaro et al., 2014)    | 66               | Cohort                    | Separate CRVO & BRVO data | Ranibizumab                              | BCVA & CRT at 2, 3 & 4 years    | Ranibizumab improves long term visual outcomes.                |
| (Chatziralli et al., 2017)    | 15               | Retrospective case series | CRVO only                 | Combination                              | BCVA & CRT at 2 years           | Anti-VEGF is effective for MO due to RVO.                      |
| (Chatziralli et al., 2018)    | 54               | Retrospective case series | Separate CRVO & BRVO data | Ranibizumab                              | BCVA & CRT at 2, 3 & 4 years    | Ranibizumab is effective long term.                            |
| (Chittajallu & Prakash, 2018) | 101              | Retrospective case series | BRVO only                 | Ranibizumab                              | BCVA at 2 years                 | Long term ranibizumab is effective.                            |
| (Costa et al., 2021)          | 208              | Retrospective case series | Mixed                     | Dexamethasone & combination              | BCVA & CRT at 3 years           | Intravitreal treatment improved long term outcomes.            |
| (Farinha et al., 2015)        | 32               | Retrospective case series | Separate CRVO & BRVO data | Ranibizumab                              | BCVA & CRT at 2 & 3 years       | Ranibizumab was satisfactory long term.                        |
| (Gale et al., 2020)           | 4879             | Retrospective case series | CRVO only                 | Ranibizumab, dexamethasone & combination | BCVA at 2 & 3 years             | Better visual outcomes with ranibizumab than other treatments. |
| (Guichard et al., 2018)       | 76               | Retrospective case series | Mixed                     | Ranibizumab                              | BCVA & CRT at 2 years           | Treat & extend superior to PRN for MO due to RVO.              |
| (Heier et al., 2012)          | 203              | RCT                       | Separate CRVO & BRVO data | Ranibizumab                              | BCVA & CRT at 2 years           | Ranibizumab is safe & effective.                               |
| (Heier et al., 2014)          | 114              | RCT                       | CRVO only                 | Aflibercept                              | BCVA & CRT at 2 years           | Anatomical improvements reduced between weeks 52 & 100.        |
| (Hikichi et al., 2014)        | 89               | Cohort                    | BRVO only                 | Bevacizumab                              | BCVA & CRT at 2 years           | Bevacizumab is beneficial at 2 years                           |
| (Horner et al., 2020)         | 54               | Cohort                    | Separate CRVO & BRVO data | Ranibizumab & combination                | BCVA & CRT at 2 & 3 years       | Combination therapy effective for MO due to RVO.               |
| (Hosogi et al., 2019)         | 32               | Retrospective case series | BRVO only                 | Ranibizumab                              | BCVA & CRT at 2 years           | Ranibizumab effective for BRVO patients.                       |
| (Hykin et al., 2019)          | 463              | RCT                       | CRVO only                 | Ranibizumab, aflibercept & bevacizumab   | BCVA & CRT at 2 years           | Aflibercept was non-inferior to ranibizumab.                   |
| (Iftikhar et al., 2019)       | 90               | Prospective case series   | Separate CRVO & BRVO data | Combination                              | BCVA & CRT at 2, 3, 4 & 5 years | Sustained anti-VEGF improved visual & anatomical outcomes.     |
| (Inagaki et al., 2019)        | 20               | Cohort                    | BRVO only                 | Ranibizumab                              | BCVA & CRT at 2 years           | Ranibizumab improved vision at 2 years.                        |



| Study author & year                 | Participants (n) | Study type                | RVO type                  | Drug regimen                             | Study outcomes                  | Conclusions                                                      |
|-------------------------------------|------------------|---------------------------|---------------------------|------------------------------------------|---------------------------------|------------------------------------------------------------------|
| (Khurana et al., 2019)              | 16               | Cohort                    | CRVO only                 | Aflibercept                              | BCVA & CRT at 2 years           | Aflibercept provided improvement at 2 years                      |
| (Korobelnik et al., 2016)           | 375              | Cohort                    | Separate CRVO & BRVO data | Dexamethasone                            | BCVA & CRT at 2 years           | Dexamethasone implant is safe                                    |
| (Larsen et al., 2018)               | 357              | Cohort                    | CRVO only                 | Ranibizumab                              | BCVA & CRT at 2 years           | Ranibizumab is effective at 2 years                              |
| (Lee, Jung & Sohn, 2014)            | 453              | Cohort                    | BRVO only                 | Triamcinolone, bevacizumab & combination | BCVA at 2 years                 | Anti-VEGF provides improved BCVA at 2 years.                     |
| (Lida-Miwa et al., 2019)            | 58               | Prospective case series   | BRVO only                 | Ranibizumab                              | BCVA & CRT at 2 years           | Neovascular changes present in BRVO treated with ranibizumab.    |
| (Lo et al., 2020)                   | 214              | Retrospective case series | Mixed                     | Combination                              | BCVA & CRT at 2 years           | Early BCVA & CRT improvements may predict long-term outcomes.    |
| (Lo et al., 2021)                   | 214              | Retrospective case series | Separate CRVO & BRVO data | Combination                              | BCVA & CRT at 2 years           | Early anatomic response increases chance of treatment cessation. |
| (Loukiano et al., 2016)             | 33               | Cohort                    | Separate CRVO & BRVO data | Bevacizumab                              | BCVA & CRT at 2 years           | Bevacizumab provides long term BCVA improvement.                 |
| (Maggio et al., 2020)               | 223              | Cohort                    | Separate CRVO & BRVO data | Combination                              | BCVA & CRT at 2, 3, 4 & 5 years | Ranibizumab & dexamethasone effective long term.                 |
| (Mansour et al., 2018)              | 10               | Cohort                    | Mixed                     | Aflibercept                              | BCVA at 2 years                 | BCVA improves over 2 years with aflibercept.                     |
| (McAllister et al., 2018)           | 29               | RCT                       | CRVO only                 | Ranibizumab                              | BCVA & CRT at 2 years           | Ranibizumab effective in CRVO patients.                          |
| (Ozkaya, Tarakcioglu & Tanir, 2018) | 174              | Retrospective case series | BRVO only                 | Ranibizumab & dexamethasone              | BCVA & CRT at 2 years           | Ranibizumab & dexamethasone effective in BRVO.                   |
| (Risard et al., 2011)               | 20               | Cohort                    | CRVO only                 | Ranibizumab                              | BCVA & CRT at 2 years           | Ranibizumab improves visual & anatomical outcomes.               |
| (Sakanishi et al., 2021)            | 40               | Cohort                    | BRVO only                 | Aflibercept                              | BCVA & CRT at 2 years           | Aflibercept effective at 2 years for BRVO .                      |
| (Scott et al., 2011)                | 389              | RCT                       | Separate CRVO & BRVO data | Combination                              | BCVA & CRT at 2 years           | Younger age predictive of higher BCVA.                           |
| (Sen et al., 2021)                  | 267              | RCT                       | CRVO only                 | Combination                              | BCVA at 2 years                 | Higher baseline BCVA was predictive of better BCVA outcomes.     |
| (Sophie et al., 2013)               | 21               | Retrospective case series | Separate CRVO & BRVO data | Ranibizumab                              | BCVA at 2 years                 | Infrequent ranibizumab not sufficient to treat MO due to RVO.    |
| (Sophie et al., 2019)               | 205              | RCT                       | BRVO only                 | Ranibizumab                              | BCVA & CRT at 2 years           | Perfusion maintenance crucial for good outcomes in CRVO.         |
| (Spooner et al., 2019)              | 68               | Retrospective case series | Separate CRVO & BRVO data | Combination                              | BCVA & CRT at 5 years           | Anti-VEGF achieved good long term outcomes for RVO.              |
| (Stredova et al., 2019)             | 39               | Cohort                    | BRVO only                 | Ranibizumab                              | BCVA & CRT at 2 years           | Ranibizumab improved long term outcomes for BRVO.                |
| (Tadayoni et al., 2017)             | 183              | RCT                       | BRVO only                 | Ranibizumab                              | BCVA & CRT at 2 years           | Long term efficacy & safety of ranibizumab proven.               |
| (Tsagakataki et al., 2015)          | 35               | Retrospective case series | BRVO only                 | Bevacizumab                              | BCVA & CRT at 2 years           | Bevacizumab provided resolution of MO in one third of patients.  |
| (Volkman et al., 2020)              | 16               | Cohort                    | Mixed                     | Combination                              | BCVA at 2 years                 | BCVA improves with anti-VEGF.                                    |
| (Wu et al., 2009)                   | 63               | Cohort                    | BRVO only                 | Bevacizumab                              | BCVA & CRT at 2 years           | Bevacizumab is effective at 2 years.                             |
