# Supplementary material for: Long-term outcomes for patients treated for macular oedema secondary to retinal vein occlusion: a systematic review
Source: PubMed Central journal article supplement — BMJ Open Ophthalmol. 2022 Jun 14;7(1):e001010. doi: 10.1136/bmjophth-2022-001010 (PMC9198693; doi:10.1136/bmjophth-2022-001010), 2022-06-14
Supplement: bmjophth-2022-001010supp004.pdf [file bmjophth-2022-001010supp004.pdf]

Supplemental Table 4. Overall Risk of Bias for RCTs, Cohort Studies and Case Series.

| RCT - Cochrane Risk of Bias Tool | Overall Risk of Bias |        |
|----------------------------------|----------------------|--------|
| (Campochiaro et al., 2010a)      | Low                  |        |
| (Heier et al., 2012)             |                      |        |
| (Heier et al., 2014)             |                      |        |
| (Hykin et al., 2019)             |                      |        |
| (McAllister et al., 2018)        |                      |        |
| (Scott et al., 2011)             |                      |        |
| (Sen et al., 2021)               |                      |        |
| (Sophie et al., 2019)            |                      | High   |
| (Tadayoni et al., 2017)          |                      | Medium |
| Cohort Studies - CASP Tool       |                      |        |
| (Blin et al., 2018)              | Medium               |        |
| (Brown et al., 2014)             | Low                  |        |
| (Calugaru and Calugaru, 2015)    |                      |        |
| (Campochiaro et al., 2014)       |                      | Medium |
| (Hikichi et al., 2014)           |                      |        |
| (Horner et al., 2020)            |                      |        |
| (Inagaki et al., 2019)           |                      |        |
| (Khurana et al., 2019)           |                      |        |
| (Korobelnik et al., 2016)        |                      |        |
| (Larsen et al., 2018)            |                      |        |
| (LeeJung and Sohn, 2014)         |                      |        |
| (Loukianou et al., 2016)         |                      |        |
| (Maggio et al., 2020)            | Medium               |        |
| (Mansour et al., 2018)           |                      |        |
| (Risard et al., 2011)            | Low                  |        |
| (Sakanishi et al., 2021)         |                      |        |
| (Stredova et al., 2019)          |                      |        |
| (Volkman et al., 2020)           | Medium               |        |
| (Wu et al., 2009)                | Low                  |        |
| Case Series - JBI Tool           |                      |        |
| (Abdallah et al., 2019)          | High                 |        |
| (Bajric and Bakri, 2016)         | Low                  |        |

|                                     |        |
|-------------------------------------|--------|
| (Blanc et al., 2018)                | Green  |
| (Busch et al., 2019)                | Orange |
| (Chatziralli et al., 2018)          | Green  |
| (Chatziralli et al., 2017)          | Green  |
| (Chittajallu and Prakash, 2018)     | Orange |
| (Costa et al., 2021)                | Green  |
| (Farinha et al., 2015)              | Green  |
| (Gale et al., 2020)                 | Green  |
| (Guichard et al., 2018)             | Green  |
| (Hosogi et al., 2019)               | Orange |
| (Iftikhar et al., 2019)             | Red    |
| (Iida-Miwa et al., 2019)            | Orange |
| (Lo et al., 2020)                   | Orange |
| (Lo et al., 2021)                   | Green  |
| (OzkayaTarakcioglu and Tanir, 2018) | Green  |
| (Sophie et al., 2013)               | Orange |
| (Spooner et al., 2019)              | Green  |
| (Tsagakataki et al., 2015)          | Green  |
