# Supplementary material for: Long-term outcomes for patients treated for macular oedema secondary to retinal vein occlusion: a systematic review
Source: PubMed Central journal article supplement — BMJ Open Ophthalmol. 2022 Jun 14;7(1):e001010. doi: 10.1136/bmjophth-2022-001010 (PMC9198693; doi:10.1136/bmjophth-2022-001010), 2022-06-14
Supplement: bmjophth-2022-001010supp006.pdf [file bmjophth-2022-001010supp006.pdf]

Supplemental Table 6. Total number of studies and participants with data for BCVA and CRT for each year of follow up.

|                  | No. Studies | No. Participants |
|------------------|-------------|------------------|
| Baseline BCVA:   | 76          | 10775            |
| BCVA at 2 years: | 65          | 10304            |
| BCVA at 3 years: | 25          | 5775             |
| BCVA at 4 years: | 11          | 501              |
| BCVA at 5 years: | 8           | 402              |

|                 | No. Studies | No. Participants |
|-----------------|-------------|------------------|
| Baseline CRT:   | 69          | 5486             |
| CRT at 2 years: | 57          | 4887             |
| CRT at 3 years: | 21          | 912              |
| CRT at 4 years: | 11          | 501              |
| CRT at 5 years: | 6           | 381              |
